# Supplementary material for: Proteomic Basis of the Antibody Response to Monkeypox Virus Infection Examined in Cynomolgus Macaques and a Comparison to Human Smallpox Vaccination
Source: PubMed Central journal article supplement (PMC3012712; doi:10.1371/journal.pone.0015547), 2010-12-30
Supplement: pone.0015547.s001.pdf [file pone.0015547.s001.pdf]

|      |                                                                  |                       |                |               |               |               |               |              |               |               |               |              |               |               |              |               |               |              |               |               |
|------|------------------------------------------------------------------|-----------------------|----------------|---------------|---------------|---------------|---------------|--------------|---------------|---------------|---------------|--------------|---------------|---------------|--------------|---------------|---------------|--------------|---------------|---------------|
| H3L  | MPXV-WRAIR087<br>MPXV-WRAIR087                                   |                       | 963            | 614           | 540           | 488           | 704           | 795          | 828           | 649           | 824           | 573          | 700           | 767           | 699          | 662           | 649           | 612          | 733           | 592           |
|      |                                                                  | average of replicates | 734            | 615           | 509           | 496           | 665           | 657          | 781           | 649           | 754           | 574          | 669           | 798           | 701          | 684           | 649           | 608          | 706           | 614           |
|      |                                                                  | <b>average all</b>    | <b>848.5</b>   | <b>614.5</b>  | <b>524.5</b>  | <b>492</b>    | <b>684.5</b>  | <b>726</b>   | <b>804.5</b>  | <b>649</b>    | <b>789</b>    | <b>573.5</b> | <b>684.5</b>  | <b>782.5</b>  | <b>700</b>   | <b>673</b>    | <b>649</b>    | <b>610</b>   | <b>719.5</b>  | <b>603</b>    |
| L4R  | MPXV_ZAI1979_088<br>MPXV_ZAI1979_088                             |                       | 2555           | 2794          | 3852          | 2569          | 3967          | 2437         | 4248          | 3492          | 3927          | 3762         | 3055          | 3502          | 3967         | 4248          | 2781          | 4248         | 2608          | 4016          |
|      |                                                                  | average of replicates | 2468           | 2531          | 3715          | 3327          | 3715          | 2781         | 4143          | 3405          | 3715          | 3492         | 3492          | 2940          | 3492         | 3927          | 3927          | 2877         | 5062          | 2863          |
|      |                                                                  | <b>average all</b>    | <b>2511.5</b>  | <b>2662.5</b> | <b>3783.5</b> | <b>2948</b>   | <b>3841</b>   | <b>2609</b>  | <b>4195.5</b> | <b>3448.5</b> | <b>3821</b>   | <b>3627</b>  | <b>2997.5</b> | <b>3497</b>   | <b>3947</b>  | <b>4087.5</b> | <b>2829</b>   | <b>4655</b>  | <b>2735.5</b> | <b>3889</b>   |
| A16L | MPXV_ZAI1979_133<br>MPXV_ZAI1979_133                             |                       | 127            | 77            | 106           | 123           | 94            | 156          | 133           | 139           | 120           | 104          | 125           | 123           | 110          | 97            | 132           | 129          | 141           | 91            |
|      |                                                                  | average of replicates | 172            | 96            | 96            | 87            | 57            | 143          | 132           | 134           | 96            | 106          | 128           | 108           | 115          | 112           | 112           | 129          | 131           | 97            |
|      |                                                                  | <b>average all</b>    | <b>149.5</b>   | <b>86.5</b>   | <b>101</b>    | <b>105</b>    | <b>75.5</b>   | <b>149.5</b> | <b>132.5</b>  | <b>136.5</b>  | <b>108</b>    | <b>105</b>   | <b>126.5</b>  | <b>115.5</b>  | <b>112.5</b> | <b>104.5</b>  | <b>122</b>    | <b>129</b>   | <b>136</b>    | <b>94</b>     |
| G4L  | MPXV_ZAI1979_078<br>MPXV_ZAI1979_078                             |                       | 110            | 124           | 129           | 106           | 145           | 144          | 85            | 159           | 159           | 154          | 108           | 164           | 136          | 115           | 133           | 131          | 128           | 145           |
|      |                                                                  | average of replicates | 155            | 99            | 122           | 113           | 114           | 71           | 106           | 142           | 164           | 143          | 69            | 106           | 132          | 123           | 134           | 134          | 136           | 144           |
|      |                                                                  | <b>average all</b>    | <b>132.5</b>   | <b>111.5</b>  | <b>125.5</b>  | <b>109.5</b>  | <b>129.5</b>  | <b>107.5</b> | <b>95.5</b>   | <b>150.5</b>  | <b>161.5</b>  | <b>148.5</b> | <b>88.5</b>   | <b>135</b>    | <b>134</b>   | <b>119</b>    | <b>133.5</b>  | <b>132.5</b> | <b>132</b>    | <b>144.5</b>  |
| E10R | MPXV_ZAI1979_063<br>MPXV_ZAI1979_063                             |                       | 140            | 103           | 125           | 106           | 123           | 103          | 129           | 83            | 70            | 84           | 96            | 127           | 77           | 137           | 80            | 111          | 97            | 84            |
|      |                                                                  | average of replicates | 118            | 104           | 125           | 94            | 136           | 121          | 121           | 103           | 75            | 92           | 56            | 125           | 84           | 120           | 77            | 113          | 96            | 84            |
|      |                                                                  | <b>average all</b>    | <b>129</b>     | <b>103.5</b>  | <b>125</b>    | <b>100</b>    | <b>129.5</b>  | <b>112</b>   | <b>125</b>    | <b>93</b>     | <b>72.5</b>   | <b>88</b>    | <b>76</b>     | <b>126</b>    | <b>80.5</b>  | <b>128.5</b>  | <b>78.5</b>   | <b>112</b>   | <b>96.5</b>   | <b>84</b>     |
| E10R | MPXV-WRAIR052<br>MPXV-WRAIR052<br>MPXV-WRAIR052<br>MPXV-WRAIR052 |                       | 254            | 286           | 360           | 320           | 268           | 497          | 265           | 325           | 406           | 268          | 378           | 418           | 322          | 341           | 328           | 361          | 372           | 356           |
|      |                                                                  | average of replicates | 350            | 330           | 439           | 374           | 262           | 446          | 338           | 361           | 341           | 260          | 329           | 327           | 327          | 343           | 267           | 346          | 314           | 321           |
|      |                                                                  | <b>average all</b>    | <b>3508</b>    | <b>504</b>    | <b>406</b>    | <b>432</b>    | <b>350</b>    | <b>401</b>   | <b>365</b>    | <b>429</b>    | <b>497</b>    | <b>274</b>   | <b>549</b>    | <b>442</b>    | <b>417</b>   | <b>354</b>    | <b>371</b>    | <b>428</b>   | <b>546</b>    | <b>367</b>    |
|      |                                                                  |                       | 3159           | 367           | 475           | 349           | 319           | 458          | 354           | 370           | 415           | 262          | 538           | 504           | 370          | 368           | 349           | 401          | 474           | 357           |
|      |                                                                  | <b>average all</b>    | <b>1817.75</b> | <b>371.75</b> | <b>420</b>    | <b>368.75</b> | <b>299.75</b> | <b>450.5</b> | <b>330.5</b>  | <b>371.25</b> | <b>414.75</b> | <b>266</b>   | <b>448.5</b>  | <b>422.75</b> | <b>359</b>   | <b>351.5</b>  | <b>328.75</b> | <b>384</b>   | <b>426.5</b>  | <b>350.25</b> |
| A3L  | MPXV_ZAI1979_119<br>MPXV_ZAI1979_119                             |                       | 134            | 329           | 348           | 414           | 284           | 341          | 262           | 289           | 314           | 649          | 365           | 132           | 472          | 367           | 372           | 264          | 300           | 483           |
|      |                                                                  | average of replicates | 161            | 343           | 371           | 445           | 238           | 333          | 187           | 310           | 305           | 580          | 328           | 203           | 460          | 320           | 391           | 267          | 262           | 452           |
|      |                                                                  | <b>average all</b>    | <b>147.5</b>   | <b>336</b>    | <b>359.5</b>  | <b>429.5</b>  | <b>261</b>    | <b>337</b>   | <b>224.5</b>  | <b>299.5</b>  | <b>309.5</b>  | <b>614.5</b> | <b>346.5</b>  | <b>167.5</b>  | <b>466</b>   | <b>343.5</b>  | <b>381.5</b>  | <b>265.5</b> | <b>281</b>    | <b>467.5</b>  |
| A13L | MPXV_ZAI1979_129<br>MPXV_ZAI1979_129                             |                       | 1513           | 139           | 65            | 92            | 117           | 160          | 112           | 139           | 108           | 123          | 110           | 122           | 120          | 62            | 106           | 97           | 82            | 155           |
|      |                                                                  | average of replicates | 1994           | 149           | 83            | 70            | 103           | 164          | 120           | 126           | 115           | 126          | 127           | 124           | 110          | 84            | 118           | 110          | 77            | 169           |
|      |                                                                  | <b>average all</b>    | <b>1753.5</b>  | <b>144</b>    | <b>74</b>     | <b>81</b>     | <b>110</b>    | <b>162</b>   | <b>116</b>    | <b>132.5</b>  | <b>111.5</b>  | <b>124.5</b> | <b>118.5</b>  | <b>123</b>    | <b>115</b>   | <b>73</b>     | <b>112</b>    | <b>103.5</b> | <b>79.5</b>   | <b>162</b>    |
| A14L | MPXV_ZAI1979_130<br>MPXV_ZAI1979_130                             |                       | 47             | 72            | 97            | 72            | 48            | 68           | 65            | 59            | 62            | 97           | 65            | 45            | 80           | 81            | 76            | 62           | 76            | 65            |
|      |                                                                  | average of replicates | 58             | 66            | 92            | 77            | 67            | 118          | 52            | 44            | 62            | 105          | 68            | 60            | 69           | 58            | 73            | 59           | 94            | 63            |
|      |                                                                  | <b>average all</b>    | <b>52.5</b>    | <b>69</b>     | <b>94.5</b>   | <b>74.5</b>   | <b>57.5</b>   | <b>93</b>    | <b>58.5</b>   | <b>51.5</b>   | <b>62</b>     | <b>101</b>   | <b>66.5</b>   | <b>52.5</b>   | <b>74.5</b>  | <b>69.5</b>   | <b>74.5</b>   | <b>60.5</b>  | <b>85</b>     | <b>64</b>     |
| A42R | MPXV_ZAI1979_161<br>MPXV_ZAI1979_161                             |                       | 135            | 143           | 138           | 104           | 114           | 261          | 101           | 117           | 125           | 121          | 162           | 144           | 126          | 91            | 136           | 103          | 142           | 129           |
|      |                                                                  | average of replicates | 47             | 136           | 136           | 120           | 160           | 254          | 118           | 127           | 127           | 113          | 262           | 101           | 128          | 121           | 132           | 104          | 132           | 140           |
|      |                                                                  | <b>average all</b>    | <b>91</b>      | <b>139.5</b>  | <b>137</b>    | <b>112</b>    | <b>137</b>    | <b>257.5</b> | <b>109.5</b>  | <b>122</b>    | <b>126</b>    | <b>117</b>   | <b>212</b>    | <b>122.5</b>  | <b>127</b>   | <b>106</b>    | <b>134</b>    | <b>103.5</b> | <b>137</b>    | <b>134.5</b>  |
| I2L  | MPXV_ZAI1979_068<br>MPXV_ZAI1979_068                             |                       | 58             | 277           | 107           | 111           | 75            | 155          | 71            | 113           | 120           | 106          | 105           | 77            | 87           | 105           | 130           | 82           | 139           | 94            |
|      |                                                                  | average of replicates | 52             | 124           | 106           | 126           | 92            | 127          | 71            | 112           | 144           | 108          | 105           | 83            | 101          | 106           | 123           | 87           | 137           | 90            |
|      |                                                                  | <b>average all</b>    | <b>55</b>      | <b>200.5</b>  | <b>106.5</b>  | <b>118.5</b>  | <b>83.5</b>   | <b>141</b>   | <b>71</b>     | <b>112.5</b>  | <b>132</b>    | <b>107</b>   | <b>105</b>    | <b>80</b>     | <b>94</b>    | <b>105.5</b>  | <b>126.5</b>  | <b>84.5</b>  | <b>138</b>    | <b>92</b>     |



| Vaccinia Ortholog | Database ID           | Non-Human Primates Day 28 (µg) |        |        |          |          | Non-Human Primates Day -1 (µg) |         |         |           |                  | Non-Human Primates Day 6 (µg) |           |           |                 |         | Human Controls (µg) |         |                   |             |             | Human Post Vaccination (µg) |  |  |  |  |
|-------------------|-----------------------|--------------------------------|--------|--------|----------|----------|--------------------------------|---------|---------|-----------|------------------|-------------------------------|-----------|-----------|-----------------|---------|---------------------|---------|-------------------|-------------|-------------|-----------------------------|--|--|--|--|
|                   |                       | 3                              | 6      | 7      | 11       | 15       | 3                              | 6       | 7       | 11        | 3                | 6                             | 7         | 11        | 1               | 2       | 3                   | 4       | 1                 | 2           | 3           | 4                           |  |  |  |  |
| A4L               | MPKV_ZAI1979_120      | 2494                           | 9703   | 2846   | 5171     | 829      | 299.5                          | 344.5   | 560     | 302.5     | 2257             | 829.5                         | 560       | 302.5     | 6554            | 923.5   | 1387.5              | 718.5   | 3352              | 3250        | 3391        | 22244                       |  |  |  |  |
|                   | MPKV_ZAI1979_120      | 2468                           | 10813  | 2712   | 5144     | 841      | 307.5                          | 320     | 581     | 379.5     | 2174.5           | 856                           | 2498      | 1771      | 5894.5          | 951     | 1199                | 694.5   | 2209              | 2979.5      | 3073.5      | 16334                       |  |  |  |  |
|                   | average of replicates | 2481                           | 10258  | 2779   | 5157.5   | 835      | 303.25                         | 325.25  | 570.5   | 341       | 2125.75          | 842.75                        | 2561.25   | 1801.75   | 6224.25         | 937.25  | 1293.25             | 760.5   | 2780.5            | 3114.75     | 3232.25     | 14949                       |  |  |  |  |
|                   | average of replicates | <b>4302.1</b>                  |        |        |          |          | <b>386.8125</b>                |         |         |           | <b>1855.375</b>  |                               |           |           | <b>2290.313</b> |         |                     |         | <b>7116.625</b>   |             |             |                             |  |  |  |  |
| A4L               | MPKV-WRAIR109         | 2431                           | 5797   | 2620   | 4712     | 764      | 313.5                          | 475     | 689     | 442.5     | 2065.5           | 733.5                         | 2051      | 1361      | 5535            | 1004.5  | 1121.5              | 767.5   | 4265.5            | 6535.5      | 6017        | 29564.5                     |  |  |  |  |
|                   | MPKV-WRAIR109         | 2437                           | 5809   | 2655   | 4602     | 706      | 280                            | 482.5   | 665.5   | 455       | 2116.5           | 597.5                         | 2589      | 1350.5    | 5541            | 983     | 1199.5              | 1116.5  | 4778              | 5155.5      | 5947.5      | 25159                       |  |  |  |  |
|                   | average of replicates | 2434                           | 5803   | 2637.5 | 4657     | 735      | 296.75                         | 478.75  | 677.25  | 448.75    | 2091             | 665.5                         | 2320      | 1355      | 5538            | 993.75  | 1160.5              | 942     | 4521.75           | 5845.5      | 5982.25     | 27617.5                     |  |  |  |  |
|                   | average of replicates | <b>3253.3</b>                  |        |        |          |          | <b>473.375</b>                 |         |         |           | <b>1608</b>      |                               |           |           | <b>2158.563</b> |         |                     |         | <b>10927.8125</b> |             |             |                             |  |  |  |  |
| A10L              | MPKV_ZAI1979_126      | 3475                           | 2846   | 3073   | 2867     | 2386     | 171.5                          | 198     | 223     | 210       | 386              | 296.5                         | 1012.5    | 462       | 8046.5          | 7374    | 588.5               | 1097    | 11469.5           | 28811       | 23615.5     | 14121                       |  |  |  |  |
|                   | MPKV_ZAI1979_126      | 3492                           | 2808   | 3090   | 2781     | 2434     | 131                            | 182.5   | 182.5   | 173       | 393              | 290.5                         | 423       | 425.5     | 8789.5          | 7064.5  | 541.5               | 1158    | 11898             | 28059.5     | 22536       | 13719.5                     |  |  |  |  |
|                   | average of replicates | 3111                           | 2530   | 2964   | 2569     | 2467     | 172.5                          | 142     | 189     | 222       | 477              | 342.5                         | 344       | 467.5     | 9201            | 8289    | 536                 | 846     | 10254             | 26162.5     | 18226       | 12059                       |  |  |  |  |
|                   | average of replicates | 3159                           | 2506   | 2808   | 2751     | 2158     | 195.5                          | 172.5   | 154     | 199.5     | 483              | 316                           | 273       | 421       | 11305.5         | 7549    | 546                 | 869     | 11533.5           | 26681.5     | 16434       | 10689                       |  |  |  |  |
|                   | average of replicates | 2794                           | 2431   | 2738   | 2383     | 2129     | 118                            | 58      | 78.5    | 94        | 257.5            | 154.5                         | 133       | 174       | 6248.5          | 3701    | 308                 | 534     | 12059             | 22536       | 13473       | 13399.5                     |  |  |  |  |
|                   | average of replicates | 2751                           | 2437   | 2751   | 2355     | 2089     | 96                             | 66      | 82      | 93.5      | 218              | 139                           | 176       | 419       | 6075            | 3503    | 328                 | 485     | 12227.5           | 23615.5     | 14676.5     | 12865.5                     |  |  |  |  |
|                   | average of replicates | 3130.333                       | 2593   | 2904   | 2617.667 | 2343.833 | 147.41667                      | 136.5   | 151.5   | 165.33333 | 369.08333        | 256.5                         | 393.58333 | 394.83333 | 8570            | 6246.75 | 474.66667           | 831.5   | 11510.25          | 25977.66667 | 18160.16667 | 12808.91667                 |  |  |  |  |
|                   | average of replicates | <b>2717.767</b>                |        |        |          |          | <b>150.1875</b>                |         |         |           | <b>393.333</b>   |                               |           |           | <b>4030.729</b> |         |                     |         | <b>17114.25</b>   |             |             |                             |  |  |  |  |
| A26L              | MPKV_ZAI1979_146      | 3135                           | 2964   | 2437   | 2227     | 5387     | 120                            | 156     | 138.5   | 139.5     | 457.5            | 293.4                         | 440       | 452       | 6975            | 5312.5  | 965.5               | 583     | 14121             | 22378       | 9639        | 7133.5                      |  |  |  |  |
|                   | MPKV_ZAI1979_146      | 3104                           | 2958   | 2383   | 2324     | 5144     | 124.5                          | 171.5   | 149.5   | 134.5     | 455              | 294                           | 436       | 401.5     | 6878.5          | 5465.5  | 1164                | 526     | 14676.5           | 22244       | 10254       | 6842                        |  |  |  |  |
|                   | average of replicates | 3119.5                         | 2961   | 2410   | 2300.5   | 5265.5   | 122.25                         | 163.75  | 144     | 137       | 456.25           | 293.75                        | 438       | 426.75    | 6926.75         | 5389    | 1064.75             | 554.5   | 14398.75          | 22311       | 9946.5      | 6987.75                     |  |  |  |  |
|                   | average of replicates | <b>3211.3</b>                  |        |        |          |          | <b>141.75</b>                  |         |         |           | <b>463.6875</b>  |                               |           |           | <b>3483.75</b>  |         |                     |         | <b>13411</b>      |             |             |                             |  |  |  |  |
| A27L              | MPKV_ZAI1979_147      | 5062                           | 3715   | 4003   | 1386     | 898      | 910                            | 876.5   | 1261.5  | 954       | 2498             | 3287                          | 2650      | 2674.5    | 8289            | 6277.5  | 8098.5              | 1569    | 13819.5           | 3801        | 3113.5      | 2035                        |  |  |  |  |
|                   | MPKV_ZAI1979_147      | 4602                           | 3111   | 3967   | 1325     | 938      | 883.5                          | 1248    | 1161.5  | 1047.5    | 2610.5           | 3230.5                        | 2783.5    | 2589      | 8575.5          | 6457.5  | 8789.5              | 1366.5  | 13122             | 3092.5      | 3288.5      | 1720.5                      |  |  |  |  |
|                   | average of replicates | 4832                           | 3413   | 3985   | 1355.5   | 918      | 896.75                         | 1062.25 | 1211.5  | 1000.75   | 2554.25          | 3256.75                       | 2716.75   | 2631.75   | 8432.25         | 6367.5  | 8444                | 1467.75 | 13470.75          | 3446.75     | 3201        | 1877.75                     |  |  |  |  |
|                   | average of replicates | <b>2900.7</b>                  |        |        |          |          | <b>1042.8125</b>               |         |         |           | <b>2790.375</b>  |                               |           |           | <b>6177.875</b> |         |                     |         | <b>5499.0625</b>  |             |             |                             |  |  |  |  |
| A27L              | MPKV-WRAIR132         | 5387                           | 3422   | 4143   | 1246     | 701      | 495                            | 1000.5  | 824.5   | 746.5     | 1732.5           | 1980.5                        | 2295.5    | 2150.5    | 16237.5         | 6945.5  | 8575.5              | 1609    | 21519             | 4778        | 10689       | 2788.5                      |  |  |  |  |
|                   | MPKV-WRAIR132         | 5277                           | 3405   | 4268   | 1263     | 619      | 466                            | 850     | 832.5   | 757       | 1889             | 2389                          | 2022      | 2053.5    | 16541.5         | 6734.5  | 8289                | 1673.5  | 18226             | 3980        | 10316.5     | 2797.5                      |  |  |  |  |
|                   | average of replicates | 5332                           | 3413.5 | 4205.5 | 1254.5   | 660      | 480.5                          | 925.25  | 828.5   | 751.75    | 1810.75          | 2184.75                       | 2158.75   | 2102      | 16389.5         | 6840    | 8432.25             | 1641.25 | 21692.5           | 4379        | 10502.75    | 2793                        |  |  |  |  |
|                   | average of replicates | <b>2973.3</b>                  |        |        |          |          | <b>746.5</b>                   |         |         |           | <b>2064.0625</b> |                               |           |           | <b>8325.75</b>  |         |                     |         | <b>9841.8125</b>  |             |             |                             |  |  |  |  |
| D8L               | MPKV_ZAI1979_110      | 2337                           | 2863   | 2376   | 2583     | 2738     | 146                            | 155     | 153     | 126.5     | 495.5            | 975                           | 431.5     | 3262      | 4940.5          | 532.5   | 587.5               | 816     | 1431.5            | 2833.5      | 2105.5      | 3313.5                      |  |  |  |  |
|                   | MPKV_ZAI1979_110      | 2314                           | 3073   | 2359   | 2555     | 2586     | 140.5                          | 149.5   | 134.5   | 161       | 550.5            | 993.5                         | 405       | 3346.5    | 5212.5          | 472     | 522                 | 826.5   | 1442              | 2765.5      | 2092        | 2375.5                      |  |  |  |  |
|                   | average of replicates | 2325.5                         | 2968   | 2367.5 | 2569     | 2662     | 143.25                         | 147.75  | 143.75  | 143.75    | 523              | 984.25                        | 418.25    | 3304.25   | 5076.5          | 502.25  | 554.75              | 821.25  | 1416.75           | 2799.5      | 2078.75     | 2844.5                      |  |  |  |  |
|                   | average of replicates | <b>2578.4</b>                  |        |        |          |          | <b>144.625</b>                 |         |         |           | <b>1307.4375</b> |                               |           |           | <b>1738.688</b> |         |                     |         | <b>2289.875</b>   |             |             |                             |  |  |  |  |
| D8L               | MPKV-WRAIR099         | 2706                           | 4268   | 3104   | 3327     | 3927     | 489.5                          | 437.5   | 463     | 490       | 1396             | 1679.5                        | 897       | 5340      | 5917.5          | 1761    | 1534                | 1455    | 2537              | 3330        | 3847.5      | 3925.5                      |  |  |  |  |
|                   | MPKV-WRAIR099         | 2363                           | 4248   | 3141   | 3159     | 3762     | 356                            | 657.5   | 463.5   | 372.5     | 1390.5           | 1976.5                        | 1230.5    | 4873      | 5379.5          | 1809    | 1429                | 1242    | 2436.5            | 3018        | 3920.5      | 3581.5                      |  |  |  |  |
|                   | average of replicates | 2784.5                         | 4258   | 3107.5 | 3243     | 3844.5   | 533.75                         | 547.5   | 466.25  | 431.25    | 1393.25          | 1828                          | 1063.75   | 5106.5    | 5948.5          | 1785    | 1481.5              | 1348.5  | 2486.75           | 3174        | 3884        | 3753.5                      |  |  |  |  |
|                   | average of replicates | <b>3447.5</b>                  |        |        |          |          | <b>494.6875</b>                |         |         |           | <b>2347.875</b>  |                               |           |           | <b>2640.875</b> |         |                     |         | <b>3324.5625</b>  |             |             |                             |  |  |  |  |
| D11L              | MPKV_ZAI1979_113      | 252                            | 0      | 319    | 799      | 895      | 961                            | 1156    | 1146    | 1002.5    | 909.5            | 592.5                         | 1990      | 1396      | 1223            | 1581    | 1921.5              | 610.5   | 1079              | 1552.5      | 1346.5      | 1780.5                      |  |  |  |  |
|                   | MPKV_ZAI1979_113      | 254                            | 3      | 323    | 781.5    | 984.5    | 981.5                          | 1365    | 1094.5  | 1300.5    | 1077.5           | 598                           | 1936      | 1368.5    | 1193            | 1569    | 1676.5              | 577.5   | 1128              | 1476        | 1332.5      | 1464                        |  |  |  |  |
|                   | average of replicates | 254                            | 3      | 323    | 781.5    | 984.5    | 971.25                         | 1260.5  | 1120.25 | 1151.5    | 905.5            | 595.25                        | 1967      | 1377.25   | 1208            | 1575    | 1799                | 594     | 1103.5            | 1514.25     | 1339.5      | 1622.25                     |  |  |  |  |
|                   | average of replicates | <b>469.2</b>                   |        |        |          |          | <b>1125.875</b>                |         |         |           | <b>1332.25</b>   |                               |           |           | <b>1294</b>     |         |                     |         | <b>1394.875</b>   |             |             |                             |  |  |  |  |
| F17R              | MPKV_ZAI1979_052      | 3762                           | 2794   | 2468   | 2437     | 10613    | 5406                           | 7975    | 9153    | 7975      | 8761             | 12819                         | 12819     | 12819     | 7374            | 10257   | 29596               | 14852   | 2152              | 3608        | 4638.5      | 3483.5                      |  |  |  |  |
|                   | MPKV_ZAI1979_052      | 3635                           | 2860   | 2434   | 2337     | 9703     | 9153                           | 5959    | 7975    | 5670.5    | 7770             | 10546.5                       | 10546.5   | 10546.5   | 6945.5          | 10531   | 31592               | 7582    | 3250              | 3201.5      | 5155.5      | 3639.5                      |  |  |  |  |
|                   | average of replicates | 3698.5                         | 2827   | 2451   | 2387     | 10258    | 7309.5                         | 6962.5  | 8564    | 6817.75   | 8265.5           | 11682.75                      | 11682.75  | 11682.75  | 7159.75         | 10394   | 30574               | 11217   | 2701              | 3404.75     | 4897.5      | 3639.5                      |  |  |  |  |
|                   | average of replicates | <b>4324.3</b>                  |        |        |          |          | <b>7413.4375</b>               |         |         |           | <b>10828.318</b> |                               |           |           | <b>14836.19</b> |         |                     |         | <b>3638.6875</b>  |             |             |                             |  |  |  |  |
| H8L               | MPKV_ZAI1979_098      | 2781                           | 2531   | 2604   | 2675     | 2437     | 333                            | 194     | 335.5   | 274.5     | 1447             | 747.5                         | 1507      | 1184.5    | 7981            | 3781    | 950.5               | 827.5   | 22536             | 10204.5     | 35615       | 5947.5                      |  |  |  |  |
|                   | MPKV_ZAI1979_098      | 2569                           | 2494   | 2583   | 2604     | 2337     | 315.5                          | 189.5   | 338     | 302.5     | 1420             | 828.5                         | 1500      | 1398      | 8098.5          | 4029.5  | 744                 | 811.5   | 21622.5           | 8489        | 31234.5     | 4148                        |  |  |  |  |
|                   | average of replicates | 2675                           | 2512.5 | 2593.5 | 2639.5   | 2387     | 324.25                         | 191.75  | 336.75  | 288.5     | 1433.5           | 788                           | 1428.5    | 1291.25   | 8039.75         | 3905.25 | 847.25              | 819.5   | 24349.25          | 9346.75     | 33424.75    | 5047.75                     |  |  |  |  |
|                   | average of replicates | <b>2561.5</b>                  |        |        |          |          | <b>285.3125</b>                |         |         |           | <b>1235.3125</b> |                               |           |           | <b>3402.938</b> |         |                     |         | <b>18042.125</b>  |             |             |                             |  |  |  |  |
| H8L               | MPKV-WRAIR087         | 3502                           | 5144   | 5171   | 5387     | 2712     | 581                            | 691     | 528.5   | 503       | 2004             | 2584                          | 1608.5    | 1842.5    | 10531           | 5353.5  | 2002                | 1163    | 33786.5           | 6724        | 48387       | 3318                        |  |  |  |  |
|                   | MPKV-WRAIR087         | 3508                           | 5170   | 5170   | 5663     | 2751     | 592                            | 511     | 592     | 534.5     | 1980.5           | 2488                          | 1537.5    | 1947.5    | 12084           | 5423.5  | 2002.5              | 1170    | 28059.5           | 6140.5      | 40330.5     | 2765.5                      |  |  |  |  |
|                   | average of replicates | 3505                           | 5157   | 5170.5 | 5525     | 2731.5   | 586.5                          | 601     | 560.25  | 518.75    | 2022.25          | 2536                          | 1573      | 1895      | 11307.5         | 5388.5  | 2002.25             | 1166.5  | 30923             | 6432.25     | 44138.75    | 3041.75                     |  |  |  |  |
|                   | average of replicates | <b>4417.8</b>                  |        |        |          |          | <b>566.625</b>                 |         |         |           | <b>2066.5625</b> |                               |           |           | <b>4966.188</b> |         |                     |         | <b>21188.9375</b> |             |             |                             |  |  |  |  |
| L4R               | MPKV_ZAI1979_088      | 2359                           | 2738   | 5277   | 2131     | 2085     | 1486.5                         | 1499    | 1704.5  | 1704.5    | 1754             | 1329.5                        | 2163.5    | 1256      | 230             | 682.5   | 2708                | 1640.5  | 1338              | 12865.5     | 1941        | 2956.5                      |  |  |  |  |
|                   | MPKV_ZAI1979_088      | 2376                           | 2655   | 4761   | 2121     | 1994     | 1217.5                         | 1300.5  | 1781.5  | 1340.5    | 1402.5           | 843                           | 2127.5    | 1344.5    | 2376.5          | 4518    |                     |         |                   |             |             |                             |  |  |  |  |

|      |                  |                       |                       |       |     |       |       |       |                       |                       |           |       |       |             |                       |        |        |        |             |                       |        |        |       |             |                       |        |        |        |        |
|------|------------------|-----------------------|-----------------------|-------|-----|-------|-------|-------|-----------------------|-----------------------|-----------|-------|-------|-------------|-----------------------|--------|--------|--------|-------------|-----------------------|--------|--------|-------|-------------|-----------------------|--------|--------|--------|--------|
|      |                  | average all           | average all           | 99    |     |       |       |       | average all           | 68.870135             |           |       |       | average all | 169                   |        |        |        | average all | 314.125               |        |        |       | average all | 688.75                |        |        |        |        |
| A42R | MPKV_Z411979_161 |                       |                       | 115   | 96  | 132   | 132   | 164   |                       | 123                   | 133       | 134   | 113   |             | 275.5                 | 393    | 344.5  | 299.5  |             | 373.5                 | 612.5  | 413.5  | 573.5 |             | 415                   | 194.5  | 627.5  | 323    |        |
|      | MPKV_Z411979_161 |                       |                       | 79    | 100 | 123   | 110   | 249   |                       | 101                   | 151       | 123   | 125   |             | 220                   | 396.5  | 308    | 339.5  |             | 369                   | 578    | 369.5  | 590.5 |             | 412                   | 189    | 533    | 290.5  |        |
|      |                  | average of replicates | average of replicates | 97    | 98  | 127.5 | 121   | 206.5 |                       | average of replicates | 97.623378 | 142   | 128.5 | 119         | average of replicates | 247.75 | 394.75 | 326.25 | 319.5       | average of replicates | 371.25 | 595.25 | 391.5 | 582         | average of replicates | 413.5  | 191.75 | 580.25 | 306.75 |
|      |                  | average all           | average all           | 130   |     |       |       |       | average of replicates | 121.78084             |           |       |       | average all | 322.0625              |        |        |        | average all | 485                   |        |        |       | average all | 373.0625              |        |        |        |        |
| I2L  | MPKV_Z411979_068 |                       |                       | 162   | 124 | 83    | 103   | 73    |                       | 142                   | 110.5     | 140.5 | 149.5 |             | 399.5                 | 736.5  | 425    | 393    |             | 348                   | 204.5  | 271    | 508   |             | 141                   | 110    | 161    | 160    |        |
|      | MPKV_Z411979_068 |                       |                       | 143   | 122 | 72    | 104   | 115   |                       | 152.5                 | 85.5      | 152.5 | 147   |             | 492.5                 | 732    | 386    | 405    |             | 361                   | 211.5  | 275    | 493.5 |             | 146.5                 | 111.5  | 160    | 183    |        |
|      |                  | average of replicates | average of replicates | 152.5 | 123 | 77.5  | 103.5 | 94    |                       | average of replicates | 138.76028 | 98    | 146.5 | 148.25      | average of replicates | 446    | 729.25 | 405.5  | 399         | average of replicates | 354.5  | 208    | 273   | 500.75      | average of replicates | 143.75 | 110.75 | 160.5  | 171.5  |
|      |                  | average all           | average all           | 110.1 |     |       |       |       | average all           | 132.87757             |           |       |       | average all | 494.9375              |        |        |        | average all | 334.0625              |        |        |       | average all | 146.625               |        |        |        |        |
